# Supplementary material for: Stably Expressed Genes Involved in Basic Cellular Functions
Source: PLoS One. 2017 Jan 26;12(1):e0170813. doi: 10.1371/journal.pone.0170813 (PMC5268456; doi:10.1371/journal.pone.0170813)
Supplement: S5 Dataset — (XLSX) [file pone.0170813.s005.xlsx]

## Sheet: S5 Dataset
Human Gene	GDI-Phred	Homolog Rat SEG
DEFB104B	0
SPRR2A	0.00022206
MAGEA9B	0.000444132
SMIM13	0.000666215
AL162431.1	0.000888309
RIMBP3C	0.00111042
FAM27A	0.00133253
DEFB106B	0.00155466
RP11-826N14.2	0.0017768
AC002553.1	0.00199895
C17orf112	0.00222111
SPANXN5	0.00244329
AC090186.1	0.00266547
AC013468.1	0.00288767
CT45A1	0.00310988
EIF4E	0.0033321
AP001885.1	0.00355433
PRAMEF5	0.00377657
KRTAP20-4	0.00399882
TRPV1	0.00422109
FAM27E1	0.00444337
CTD-2561J22.3	0.00466565
GAGE2B	0.00488795
CCL3L1	0.00511026
AC226150.4	0.00533258
CXorf31	0.00555492
RP11-219B4.6	0.00577726
AC005493.1	0.00599962
PRR23D1	0.00622199
RP11-404L6.2	0.00644436
AC111200.1	0.00666675
SUMO1	0.00688916
RP11-116D17.1	0.00711157
RGPD6	0.00733399
CT45A6	0.00755643
SULT1A3	0.00777888
TMSB15A	0.00800133
RP11-505K9.4	0.0082238
RP11-67H2.1	0.00844628
AC011475.1	0.00866878
AC011366.3	0.00889128
SNURF	0.0091138
DLEU2L	0.00933632
PKIA	0.00955886
DNAJC25-GNG10	0.00978141
IFI6	0.010004
IQCJ	0.0102265
FAM72A	0.0104491
SPIN2B	0.0106717
MTRNR2L9	0.0108943
RP11-552I14.1	0.0111169
SLN	0.0113396
NBL1	0.0115622
RABGEF1	0.0117849
AL591025.1	0.0120075
NUDT4	0.0122302
AC120194.1	0.0124529
LINC00998	0.0126756
GTF2A1L	0.0128983
MAPRE3	0.013121
C1QL3	0.0133438
PEA15	0.0135665
CTAGE5	0.0137893
KM-PA-2	0.014012
AC011484.1	0.0142348
SPHAR	0.0144576
TBC1D3	0.0146804
SHFM1	0.0149032
DEFB104A	0.0153489
DEFB123	0.015126
WDR83OS	0.0155717
SCML1	0.0157946
SSU72	0.0160174
GNB1	0.0162403
SRY	0.0164632
MED21	0.0166861
FAM127C	0.016909
LMO3	0.017132
RAPGEF6	0.0173549
GOLGA8N	0.0175778
ZFAND5	0.0178008
TSPAN7	0.0180238
AC140481.2	0.0182468
NGFRAP1	0.0184698
FGF7	0.0186928
RPS28	0.0189158
RAB14	0.0191388
RPS23	0.0193619
RPL22	0.0195849
RP11-458D21.5	0.019808
CETN2	0.020031
SLX1B	0.0202541
HIST1H2AE	0.0204772
AC006486.9	0.0207003
AC003043.1	0.0238251
AC012485.1	0.0236018
AC026407.1	0.0233786
AC092384.1	0.0231553
AL049747.1	0.0229321
AL441883.1	0.0227088
AP000304.1	0.0224856
BX649567.1	0.0222624
CATX-2	0.0220392
CTC-429P9.4	0.0218161
LRLE1	0.0215929
RP11-20I23.1	0.0213697
RP11-318A15.7	0.0211466
RP11-343C2.12	0.0209235
SERF1B	0.0240484
PSMC3	0.0242717
YAF2	0.024495
TRAPPC1	0.0247183
SEC11A	0.0249416
SPATA31A5	0.0251649
DEFB106A	0.0253883
ANKRD20A3	0.0256117
CTC-326K19.6	0.025835
KRTAP20-3	0.0260584
CD59	0.0262818
CCNC	0.0265052
FGF13	0.0267286
RPS15	0.0269521
YWHAZ	0.0271755
SPRYD7	0.027399
RAB8A	0.0276224
RP11-9B6.1	0.0278459
NUDT11	0.0280694
AL121963.1	0.0282929
SCHIP1	0.0287399
TEX261	0.0285164
CT83	0.0289635
RAB9A	0.029187
DPY30	0.0298577
RBM4	0.0296341
UBE2QL1	0.0294106
PRAMEF3	0.0300813
MINOS1	0.0303049
ZNF706	0.0305285
ASF1A	0.0307522
NNAT	0.0309758
RP11-347C12.3	0.0311995
HMGN2	0.0314231
AP3S2	0.0316468
KLRC4	0.0318705
AP2S1	0.0325416
GNG3	0.0323179
TUBA1B	0.0320942
WFDC11	0.0327653
MAP1LC3A	0.0332128
SF3B5	0.0329891
PAGE4	0.0334366
RPL19	0.0341079
SMIM4	0.0338841
SNX12	0.0336604
RPS13	0.0343318
MPV17L	0.0345556
SMN1	0.0347794
INIP	0.0352271
RAP2C	0.0350033
BANF1	0.0363466
DCAF7	0.0361227
FAM219A	0.0358988
RPS18	0.0356749
UBL5	0.035451
CDC42SE1	0.0383623
CKS2	0.0381383
EIF1B	0.0379143
HSPE1	0.0376903
NEDD8-MDP1	0.0374663
NFIX	0.0372424
RP11-155D18.14	0.0370184
RPS8	0.0367944
TUSC2	0.0365705
AP1S2	0.0399308
ARF1	0.0397067	Arf1
ATP6V0E1	0.0394826
HSPE1-MOB4	0.0392585
NUTF2	0.0390345
RPL21	0.0388104
RPS11	0.0385864
CTB-60B18.6	0.0414998
CTC-479C5.12	0.0412756
GRB2	0.0410515
H3F3A	0.0408273
KLRC4-KLRK1	0.0406032
PTTG1	0.040379
RP11-87C12.2	0.0401549
SNRPD1	0.041724
RPS27	0.0421724
UBE2D2	0.0419482
PITPNB	0.0432937
RBM17	0.0430694
RPS19	0.0428451
RPS26	0.0426209
UBE2V2	0.0423967
NCBP2	0.043518
LAMTOR3	0.0439666
WDR82	0.0437423
YEATS4	0.0441909
PLA2G10	0.0444152
RPA3	0.0446396
ENY2	0.0450883
RAP1B	0.0448639
RPS15A	0.0455371
UBE2Z	0.0453127
AC009802.1	0.0464347
AC010760.1	0.0462103
RAB10	0.0459859
UBE2N	0.0457615
BEX4	0.0466592
SH2D1A	0.0468836
H2AFV	0.0473326
UBE2E2	0.0471081
TCEB3CL	0.0475571
RNF11	0.0477816
WI2-3308P17.2	0.0480061
YPEL2	0.0482306
RP11-1021N1.1	0.0484552
RP11-599B13.6	0.0486797
GABARAPL1	0.0489043
C21orf90	0.0491289
ARL4C	0.0493534
LINC01119	0.049578
RAB11A	0.0498027
RP11-62N21.1	0.0500273
DEFB105A	0.0502519
H2AFY	0.0504766
UBE2B	0.0507012
NXT2	0.0509259
RGCC	0.0511506
RPRD1A	0.0513752
ETF1	0.0516
BEX5	0.0518247
C7orf69	0.0520494
STMN2	0.0522741
AC003005.4	0.0524989
FXYD6	0.0527236
C18orf32	0.0529484
RP11-447L10.1	0.0531732
KB-1980E6.3	0.053398
TCEB3C	0.0536228
RP11-347C12.1	0.0538476
NABP2	0.0540725
HIST2H2AC	0.0542973
RP11-770J1.5	0.0545221
MTRNR2L11	0.054747
C9orf53	0.0549719
PSMA6	0.0551968
RPS29	0.0554217
PTMS	0.0556466
PAGE2	0.0558715
APOA2	0.0560965
NPIPB3	0.0563214
ISY1	0.0565464
POLR2D	0.0567713
AC132216.1	0.0569963
C1orf137	0.0572213
IL18	0.0574463
CAMK2A	0.0578964
CDC42SE2	0.0576713
AC016586.1	0.0581214
DEFB107A	0.0583464
ENHO	0.0585715
SERP1	0.0587966
MTRNR2L8	0.0590217
CBX5	0.0592468
CHP1	0.0594719
RHOXF2B	0.059697
AC006126.3	0.0630752
AC008372.1	0.0628499
AC008964.1	0.0626247
AC073342.1	0.0623994
AC110792.1	0.0621741
AL121895.1	0.0619489
AL132989.1	0.0617236
AL161645.2	0.0614984
AP001094.1	0.0612732
FKSG62	0.061048
L47234.1	0.0608228
LINC00908	0.0605976
MTRNR2L13	0.0603724
SMIM1	0.0601473
ZFY	0.0599221
ACTB	0.0633006
ATXN7L3B	0.0635259
FAM106A	0.0637512
PGA4	0.0639765
RIT1	0.0642019
SMIM10	0.0644273
PLEKHF2	0.0646527
S100A8	0.064878
ARGLU1	0.0651034
YPEL5	0.0653289
PPBP	0.0655543
AL353354.1	0.0657797
HIGD2A	0.0660052
NHLH2	0.0662306
WFDC13	0.0664561
U2AF2	0.0666816
NDUFA5	0.0669071
TRAPPC2	0.0671326
CORT	0.0675836
UBE2G2	0.0673581
AL158147.2	0.0678092
RPL36AL	0.0680347
RP11-272B17.2	0.0682603
AC013269.5	0.0684859
PURA	0.0687115
EEF1A2	0.0689371
CFL2	0.0691627
H2AFX	0.0693883
DEFB4A	0.069614
TUBB4B	0.0698396
CREBL2	0.0700653
EDF1	0.0702909
FAM153C	0.0705166
FAM49A	0.0707423
GADD45A	0.070968
CCL18	0.0711937
SPCS3	0.0714195
AF196779.12	0.0716452
MMP23B	0.071871
RP11-944C7.1	0.0720967
PPP4C	0.0723225
SPANXN1	0.0725483
IFNG	0.0727741
AL627171.1	0.0729999
SMIM12	0.0732257
RPL10	0.0734516
C10orf32-ASMT	0.0736774
GAGE10	0.0739033
ACTR2	0.0741292
BTLA	0.074355
RP11-738G5.2	0.0745809
UXT	0.0748068
SMIM19	0.0750328
PLN	0.0752587
RP5-1052I5.2	0.0754846
FAM27E3	0.0757106
AC007557.1	0.0759366
POLR2M	0.0761625
FAM150B	0.0763885
RP11-701P16.2	0.0766145
RPRM	0.0768405
IL31	0.0770666
CNIH2	0.0775186
KCTD6	0.0772926
SMARCB1	0.0777447
COX14	0.0779708
RAP2A	0.0781969
TARDBP	0.0784229
RP11-404P21.8	0.0786491
SPIN4	0.0788752
YWHAH	0.0791013
PPP1R14B	0.0793274
DDX3X	0.0795536
RP11-386G21.1	0.0797798
PTP4A2	0.0800059
TMEM35	0.0802321
METTL9	0.0804583
BLCAP	0.0806845
WFDC2	0.0809108
RAB15	0.081137
C2orf27B	0.0813633
ARL8A	0.082721
BLOC1S1	0.0824947
INMT-FAM188B	0.0822684
RAP1A	0.0820421
SF3B4	0.0818158
TMA7	0.0815895
SPINK13	0.0829473
PCSK1N	0.0831737
UBE2R2	0.0834
GABARAPL2	0.0849848
NUDCD2	0.0847584
PSMA2	0.084532
RBM8A	0.0843056
SS18L2	0.0840791
TUBB2A	0.0838528
ZNF705D	0.0836264
SPDYE2	0.0852113
RPL10A	0.0854377
CT55	0.0856642
ACTC1	0.0858907
GCHFR	0.0861172
GNG4	0.0867967
SNRPB2	0.0865702
TMEM258	0.0863437
RETN	0.0870233
PSME3	0.0872498
RPL34	0.087703
RPS25	0.0874764
AC010547.9	0.0890627
CTD-2369P2.10	0.0888361
HIST2H2AB	0.0886094
RP1-27O5.3	0.0883828
RP11-133K1.2	0.0881562
RPL23	0.0879296
CGB8	0.0892894
DLX1	0.089516
XAGE3	0.0897427
IL21	0.0899694
COPS2	0.0901961
HNRNPD	0.0906496
UBE2K	0.0904229
PTPLB	0.0908763
NCS1	0.0911031
PTH	0.0913299
BTF3L4	0.0915566
CXCL13	0.0917834
LDOC1	0.0920102
PFDN1	0.092237
VSNL1	0.0924639
DSTN	0.0926907
CTD-2132N18.3	0.0931444
SH3BGRL	0.0929176
IKBKG	0.0933713
POLR2K	0.0935982
ZMAT2	0.0938251
CCL2	0.094052
TAGLN3	0.0942789
NAA38	0.0945058
TGIF2	0.0947328
ST20-MTHFS	0.0949598
PPP1CB	0.0951867
RAB20	0.0954137
YWHAE	0.0956407
PRAMEF21	0.0958677
LAMTOR2	0.0960947
ATP1B3	0.0963217
RGS17	0.0965488
USP17L18	0.0967758
AC023469.1	0.0970029
AL139333.1	0.09723
DEFB136	0.0974571
TMEM47	0.0976842
S100B	0.0979113
MAGOH	0.0981384
SMPX	0.0983655
C1orf134	0.0985927
AC106873.4	0.0988198
POLR2L	0.099047
INS	0.0992742
SAMD13	0.0995014
MTRNR2L1	0.0997286
HBA1	0.0999558
RAB4B	0.100183
AL136218.1	0.10041
SOD1	0.100638
SPTSSB	0.100865
SNX3	0.101092
NPIPA2	0.101319
GSKIP	0.101547
DEFB113	0.101774
RAB2A	0.102001	Rab2a
HMGB3	0.102229
AC007773.3	0.104958
AC027228.1	0.10473
AC091948.1	0.104503
AC131935.1	0.104275
AC136297.1	0.104048
AC137932.1	0.10382
AL035681.1	0.103593
C20ORF135	0.103366
CWC15	0.103138	Cwc15
DKFZP434E1119	0.102911
MGC4771	0.102683
RP11-159D12.5	0.102456
AL031590.1	0.105185
FAM24B	0.105413
C19orf43	0.10564
C20orf187	0.105868
AC107021.1	0.106095
RPL24	0.106323
CXorf56	0.10655
NDUFA1	0.106778
AC015987.2	0.107006
ECSCR	0.107233
BBS1	0.107461
UBE2G1	0.107688
TAF13	0.108144
TIMM10	0.107916
MTCP1	0.108371
RP11-1C1.5	0.108599
NOTCH2NL	0.108827
LINC00696	0.109054
DEFB114	0.109282
PRPS2	0.10951
MZT1	0.109737
CTD-2260A17.2	0.109965
NME1	0.110193
EIF4EBP1	0.110421
AC008132.1	0.110649
KRTAP22-2	0.110876
RAB6B	0.111104
AC003102.1	0.111332
RP11-315O6.2	0.11156
SLC48A1	0.111788
AL590714.1	0.112015
ZDHHC9	0.112243
BBIP1	0.112471
AC026461.1	0.112699
GOLGA8R	0.112927
ZNF713	0.113155
RP11-585F1.10	0.113383
UBALD2	0.113611
TMEM158	0.113839
TBC1D3G	0.114067
FAM199X	0.114295
SCGB2A1	0.114523
BIRC5	0.114751
CRB3	0.114979
KCNA2	0.115207
NXT1	0.115435
GNGT1	0.115663
C6ORF50	0.115891
UBE2D1	0.116119
SNX24	0.116347
CDK1	0.116575
LRRC3B	0.116803
NKIRAS2	0.117031
CCDC71L	0.117259
CBLN4	0.117487
MAFG	0.117716
BCL2L1	0.117944
ABHD17C	0.118172
GNG7	0.1184
C1QTNF1-AS1	0.118628
CLLU1OS	0.118857
XK	0.119085
S100A10	0.119313
CHIC1	0.119541
SNRPN	0.119769
COX6B1	0.119998
PSMC1	0.120226	Psmc1
RAB24	0.120454
MALL	0.120683
ERAS	0.120911
TMEM185A	0.121139
PNRC2	0.121368
ARF5	0.121596
UBL3	0.121824
RPP25L	0.122053
NR2F1	0.122281
PSMA3	0.12251
TCEAL8	0.122738
SCGB3A2	0.122966
MLLT11	0.123195
COPS5	0.123423
UBE2E3	0.123652
RP11-302B13.5	0.12388
AC022819.2	0.124109
DUX4L4	0.124337
YWHAQ	0.124566
UPRT	0.124794
HIST1H3B	0.125023
AC174470.1	0.125251
RP11-834C11.12	0.12548
SCAND1	0.125708
TMEM203	0.125937
KRAS	0.126166
ATP5G1	0.126394
NAA20	0.126623	Nat5
GPR4	0.126851
PKIG	0.12708
EMC6	0.127309
RP11-552F3.12	0.127537
AGO2	0.128223
CAMK2N2	0.127995
FAM203A	0.127766
CCL19	0.128452
TXNL4A	0.128681
SLURP1	0.12891
MGC10955	0.129138
LSM1	0.129367
GPX8	0.129596
CNPY2	0.130282
RPS9	0.130054
TPT1	0.129825
OXT	0.130511
DEXI	0.13074
GID8	0.130969
BST2	0.131198
ACTA2	0.131427
HPRT1	0.132113
PTEN	0.131884
TUBA4A	0.131655
RASL10A	0.132342
POLR2C	0.132571
BCL7B	0.1328
URM1	0.133029
SDHAF2	0.133258
PITHD1	0.133487
RUVBL1	0.133716
PRAMEF19	0.133945
RP11-706O15.1	0.134174
NRAS	0.134632
PDZD11	0.134403
H2AFJ	0.13509
TMEM167B	0.134861
CLPP	0.135319
INTS4L2	0.135548
PSMD14	0.135777
RPS4Y2	0.136007
CHMP5	0.136236
ZBTB14	0.136465
CEBPG	0.136694
RPL31	0.136923
SNRNP27	0.137152
GYPE	0.137381
POLR2J	0.137611
DNAJC5	0.13784
CCL21	0.138069
LY6H	0.138298
CNIH1	0.138528
GOLGA6L1	0.138757
ARPC4	0.138986
MRFAP1	0.139215	Mrfap1
PITPNA	0.139445
RP11-529K1.3	0.139903
YWHAG	0.139674
AL049840.1	0.140133
YY2	0.140362
VBP1	0.140591
SRP9	0.140821
RAB40C	0.14105
IFITM1	0.141279
AC092964.1	0.141509
AC005549.3	0.143574
AC015660.1	0.143345
AC093157.1	0.143115
CTD-2207O23.12	0.142886
CTD-2330K9.3	0.142656
DKFZP434H0512	0.142427
RP11-162A12.2	0.142197
RP11-94B19.4	0.141968
TMEM56-RWDD3	0.141738
RIMS4	0.143804
HPCA	0.144033
CXCR3	0.144263
LEPROT	0.144492
TIAL1	0.144722
PPIA	0.144951
TSLP	0.145181
EMC8	0.145411
PLAC8	0.14564
FBXL3	0.14587
ATF7	0.146099
AC092675.3	0.146329
CLEC3B	0.146559
COPZ1	0.146788
SMC1A	0.147018
DAD1	0.147248
SPTSSA	0.147478
C1orf21	0.147707
PAFAH1B2	0.147937
RP11-181C3.1	0.148167
SPPL3	0.148397
RQCD1	0.148626
UBE2D3	0.148856	Ube2d3
UBE2F	0.149086
SPIN1	0.149316
EIF5A	0.149546
CXorf40A	0.149775
ACER3	0.150005
C20orf24	0.150235
SNRPF	0.150465
PIM2	0.150695
C10orf32	0.150925
XAGE5	0.151155
RPL37A	0.151385
CXCL9	0.151615
SMAD2	0.151845
UBE2L3	0.152075
MSMB	0.152305
FAM183B	0.152534
PPP1CA	0.152764
SUMO3	0.152994
CXorf66	0.153225
KRTAP23-1	0.153455
RPSA	0.153685
GK	0.153915
TMEM100	0.154145
MDK	0.154375
SEPT7	0.154605
RANBP1	0.154835
RAB7A	0.155065
LALBA	0.155295
PIN1	0.155525
SMN2	0.155756
CCDC53	0.155986
AP005482.1	0.156216
FAM50A	0.156446
GRIN1	0.156676
PRELID1	0.156907
VAMP8	0.157137
HIST1H2AC	0.157367
C12orf76	0.157597
RP11-1102P16.1	0.157828
TGIF2-C20orf24	0.158058
MOB1A	0.158288
POLR2G	0.158518
HIST1H4J	0.158749
PAIP2	0.158979
ARL5B	0.159209
SEC61A1	0.15944
TMED10	0.15967
MARVELD1	0.1599
VAMP3	0.160131
HIST1H4I	0.160361
BLOC1S6	0.160592
DPF2	0.160822
MED10	0.161053
ATP1B1	0.161283
DEFB121	0.161513
DPM3	0.161744
CISD1	0.161974
HSD11B1	0.162205
RPS3A	0.162435
ANP32A	0.162666
TSPAN5	0.162896
RHEB	0.163127
RP11-831H9.11	0.163358
IRF1	0.163588
TNNI2	0.163819
MMD	0.164049
VAMP1	0.16428
RAC2	0.164511
S100A7	0.164741
NUCKS1	0.164972
ORMDL3	0.165203
LACRT	0.165433
RP11-371E8.4	0.165664
RALA	0.165895
RHOV	0.166125
NDUFC2	0.166356
PAX6	0.166587
SLC25A5	0.166817
GSK3A	0.167048
KCNJ4	0.167279
AC011530.4	0.16751
HBA2	0.167741
POLR2I	0.167971
CDK5R1	0.168202
RPL36	0.168433
LYPLA2	0.168664
RP11-521M14.2	0.168895
ARL4A	0.169587
GDI1	0.169356
NR2F2	0.169126
TIMM23	0.169818
SUPT4H1	0.17028
TIMM9	0.170049
UBE2I	0.170511
HDGFRP3	0.170742
C11orf44	0.170973
EFNA2	0.171204
DDA1	0.171897
MYCBP	0.171666
RAC1	0.171435
SMAD5	0.172128
AES	0.172359
MAT2A	0.17259
HBG1	0.172821
CDK5	0.173052
FDCSP	0.173283
TNNC1	0.173514
SPATA31A7	0.173745
GTF2H5	0.173977
PSMA5	0.174208	Psma5
SYT1	0.174439
EIF4A2	0.17467
PPP1CC	0.174901
THAP1	0.175132
OPN1MW2	0.175364
AL627171.2	0.176057
MTRNR2L6	0.175826
TCEB3CL2	0.175595
TMEM107	0.176289
ILF2	0.176751
YPEL4	0.17652
ADIPOR1	0.176982
ARTN	0.177214
DRG1	0.177908	Drg1
RAP2B	0.177676
SAR1A	0.177445	Sar1a
CHIC2	0.178139
PFDN5	0.178602
RPS27A	0.17837
CTD-2410N18.5	0.178833
SH3BGRL3	0.179064
TCEAL7	0.179296
EIF4A1	0.179527
RPL37	0.179759
TM4SF2	0.17999
RP11-544M22.13	0.180453
SELT	0.180222
DENR	0.180916
GNAQ	0.180685
AP1M1	0.181148
MAP2K1	0.181379
AGAP10	0.181611
SLPI	0.181842
HRAS	0.182074
RER1	0.182305	Rer1
ADIRF	0.182537
MAGEH1	0.182768
CHMP4B	0.183
ZNF581	0.183232
MYL2	0.183463
UBE2L6	0.183695
PCGF5	0.183927
DEFB110	0.184158
PAFAH1B1	0.18439
NDUFB11	0.184622
U2AF1	0.184853
COA5	0.185085
C5orf58	0.185317
DESI1	0.185549
HNRNPH2	0.18578
VPS29	0.186012
ANG	0.186244
CT62	0.186476
BRI3	0.186707
TWIST2	0.186939
NSG2	0.187171
CA7	0.187403
CDKN2AIPNL	0.187635
CTD-2014B16.3	0.187867
KCNF1	0.188099
AC023590.1	0.18833
RHOB	0.188562
COA3	0.188794
AMELY	0.189026
HIST1H2AJ	0.189258
ZNF121	0.18949
DYNLRB1	0.189722
PATE2	0.189954
TRA2B	0.190186
ABRACL	0.190418
HSD17B10	0.19065
ANAPC15	0.190882
PSMD11	0.191114	Psmd11
TOMM6	0.191346	Prickle4
C12orf39	0.191578
CRK	0.19181
MED20	0.192042
CRABP2	0.192274
DCTD	0.192507
LSM5	0.192739
PCBD2	0.192971
TMEM170B	0.193203
HPCAL4	0.193435
TIMM13	0.193667
SRP54	0.193899	Srp54a
NPM3	0.194132
AL353698.1	0.194364
TVP23B	0.194596
FADD	0.194828
PDIK1L	0.195061
CHCHD7	0.195293
WNT3	0.195525
TBL1XR1	0.195757
HSBP1L1	0.19599
SUB1	0.196222
SDHC	0.196454
SKA2	0.196687
C6orf164	0.196919
RP11-195F19.5	0.197151
FAM96A	0.197384
DCAF12L1	0.197616
CHCHD1	0.197849
RHOXF1	0.198081
PLP1	0.198313
BEX1	0.198546
AC142381.1	0.198778
HIST1H3D	0.199011
MTURN	0.199243
RP11-171N4.2	0.199476
LSM3	0.199708
SPINK14	0.199941
IQCF3	0.200173
SENP8	0.200406
GATSL2	0.200638
C7orf60	0.200871
CTF1	0.201103
EMX1	0.201336
SAP18	0.201569
DIRAS1	0.201801
PTPN20B	0.202266
SMU1	0.202034	Smu1
RP11-343C2.11	0.202499
WFDC10B	0.202732
ABCE1	0.202964	Abce1
COMMD6	0.203197
AC132872.2	0.203663
RP11-680G10.1	0.20343
RP11-187E13.2	0.203895
RPL11	0.204128
C16orf80	0.204361
GPM6A	0.204594
IGFL2	0.204826
POMP	0.205059
SYCP3	0.205292
HIST1H3G	0.205525
PSMC4	0.205758	Psmc4
PPP2CB	0.20599
AMY1A	0.206223
EIF5A2	0.206456
C12orf75	0.206689
RAB11B	0.206922
GNG11	0.207155
OPN1MW	0.207388
KRTDAP	0.207621
CXorf21	0.207853
KCNIP4	0.208086
HRH2	0.208319
FGF17	0.208552
PFDN6	0.208785
AMY1C	0.209018
BOP1	0.209251
C2orf66	0.209484
AC007421.1	0.209717
COMMD3-BMI1	0.210184
STX1B	0.20995
RPS24	0.210417
KCNK9	0.21065
DIRAS2	0.210883
C11orf58	0.211116
IL10	0.211349
SMIM21	0.211582
SEC11C	0.211815
MED11	0.212048
HIST1H4C	0.212282
SVIP	0.212515
RP11-321M21.3	0.212748
TUBB4A	0.212981
CCL23	0.213214
PRIMA1	0.213448
VKORC1	0.213681
TOMM22	0.213914
AC110615.1	0.214147
CTD-2510F5.6	0.214381
PTS	0.214614
EIF4EBP3	0.214847
RIPPLY2	0.215081
POLR1D	0.215314
SMIM7	0.215547
GMFB	0.215781
PCNA	0.216014
ATP5H	0.216247
PSMA7	0.216481
C21orf59	0.216714
AL035406.1	0.217881
AL121901.1	0.217648
AL590452.1	0.217415
C15ORF31	0.217181
POTEB	0.216948
MEAF6	0.218115
IL2	0.218348
PRKAR1A	0.218582
HIST1H3H	0.218816
C19orf70	0.219049
ZC4H2	0.219283
WDR61	0.219516
CACNG3	0.21975
LGALS7B	0.219983
KAAG1	0.220217
FAM25C	0.220451
TPM1	0.220684
FADS2	0.220918
CDKN2D	0.221151
SRP19	0.221385
AP000721.4	0.221619
RNF187	0.221852
TAF12	0.222086
RPL26	0.22232
SNAP25	0.222554
DEFB134	0.222787
UBE2M	0.223021
GOLGA7	0.223255
CNOT7	0.223489
HNRNPK	0.223722
TP53I11	0.223956
C7orf49	0.22419
ANAPC16	0.224658
FAM19A1	0.224424
HSPA8	0.224892
RTP3	0.225125
ARX	0.225359
REG1A	0.225593
BRK1	0.225827
NFYB	0.226295
TMEM208	0.226061
HAMP	0.226529
HIST2H2BE	0.227231
SF3A3	0.226997
TMEM60	0.226763
LSM6	0.227465
PTP4A1	0.227933
TAC1	0.227699
BCL2L2-PABPN1	0.228167
HINT1	0.228401
ARL15	0.228635
CDK2AP2	0.228869
CUL1	0.229103	Cul1
BUD31	0.229337
PYDC1	0.229571
YIPF6	0.229805
PSMC2	0.230039
FAM127B	0.230274
MUCL1	0.230508
AD000671.6	0.230742
CDC73	0.230976
AL138815.1	0.23121
CBX3	0.231444
TYMS	0.231679
RAB8B	0.231913
TUBG1	0.232147
DNAJA1	0.232381
RIBC1	0.232616
PIH1D3	0.23285
PAK3	0.233084
SPACA4	0.233319
RP11-451M19.3	0.233553
NAP1L1	0.233787
DTD2	0.234022
TMEM30C	0.234256
ACTG2	0.234725
ATP6V1C1	0.23449
SRSF11	0.234959
RNF24	0.235193
TUBB6	0.235428
RP4-539M6.19	0.235662
RP11-432B6.3	0.235897
KRTAP13-3	0.236131
FBXO48	0.236366
RP11-352D3.2	0.2366
AC017081.1	0.237069
USP27X	0.236835
HIST3H2A	0.237304
PTPN20A	0.237538
AC083862.1	0.237773
SPINK4	0.238007
OGT	0.238242
TSN	0.238476	Tsn
HIST1H2AM	0.238946
PDRG1	0.238711
PPP3CA	0.23918
NOVA2	0.239415
CYCS	0.23965
AC012360.2	0.240119
BX255923.1	0.239884
RPS6KB1	0.240354
RPS10	0.240588
SSR2	0.240823
TBP	0.241058
IL15	0.241292
MEF2C	0.241527
HIST2H3D	0.241762
ARPC5	0.241997
CCL20	0.242231
EDNRA	0.242466
SUV39H1	0.242701
REXO1L1P	0.242936
C20orf62	0.243171
ZNF449	0.243406
HIST1H3I	0.24364
CXorf27	0.243875
SOX14	0.24411
PRKACA	0.244345
TNP1	0.24458
NPIPA8	0.244815
SPRR2E	0.24505
TMEM184C	0.245285
FUNDC2	0.24552
AC010336.1	0.245755
AC003101.1	0.24599
RPS10-NUDT3	0.246225
KCNG3	0.24646
SRC	0.246695
CDK2AP1	0.24693
CDK8	0.247165
QKI	0.2474
RP11-598P20.5	0.247635
MAX	0.24787
HIST1H3C	0.248105
AL353354.2	0.24834
TBC1D3F	0.248575
TRMT112	0.248811
HIST1H4E	0.249046
MROH7-TTC4	0.249281
RAB3A	0.249516
RPS5	0.249751
PBDC1	0.249987
CPLX2	0.250222
SSR4	0.250457
RABL5	0.250692
AL079342.1	0.250927
SCGB2B2	0.251163
ACTA1	0.251398
S100A12	0.251633
PYDC2	0.251869
DPPA5	0.252104
COQ10B	0.252339
C19orf18	0.252575
TSC22D3	0.25281
PTBP2	0.253045
KLHL15	0.253281
PAFAH1B3	0.253516
NDUFA4	0.253752
HIST1H4H	0.253987
RP11-47I22.3	0.254222
AKT3	0.254458
CLTB	0.254693
FEV	0.254929
PLAC1	0.255164
TRIAP1	0.2554
TSPAN31	0.255635
PMCH	0.255871
KCNMB4	0.256106
HNRNPC	0.256342
BCL2L11	0.256577
RAC3	0.256813
CLDN10	0.257049
FAM49B	0.257755
RPLP1	0.25752
UBLCP1	0.257284
RARRES3	0.257991
GLYATL1	0.258227
LDOC1L	0.258462
RPL36A	0.258698
CLIC4	0.258934
WFDC9	0.259169
PRNT	0.259405
KCNG1	0.259641
KLHDC3	0.259877
AL033381.1	0.260112
HIST1H4A	0.260348
AP001652.1	0.260584
PSMA4	0.26082	Psma4
S100A4	0.261056
IL4	0.261291
ZIC1	0.261527
CCDC103	0.261763
PRM2	0.261999
KCMF1	0.262235
MANF	0.262471
TXN	0.262707
HIST1H2AD	0.262942
DCUN1D1	0.263178
GLRX	0.263414
CXCL14	0.26365
ERI3	0.263886
FGF4	0.264122
SIX1	0.264358
RP11-204N11.1	0.264594
TMED2	0.26483
AC131097.4	0.265066
HIST1H2BF	0.265302
PYCARD	0.265538
BUB3	0.265774
RAB9B	0.26601
DNAL4	0.266483
RHEBL1	0.266246
SKP2	0.266719
CCL7	0.266955
TTC9B	0.267191
SNCB	0.267427
IL2RG	0.267663
COX7B2	0.267899
PSMC5	0.268136
FAM3C	0.268372
RPS6	0.268608
ATPIF1	0.268844
COPRS	0.269317
SYP	0.269081
USF1	0.269553
TOMM34	0.269789
HNRNPA2B1	0.270026
AL645730.2	0.270262
PA2G4	0.270498
N4BP2L1	0.270735
AC007952.5	0.270971
C6orf100	0.271207
TRNP1	0.271444
AP001024.1	0.27168
HSBP1	0.271916
DPH3	0.272153
CALCB	0.272389
AC079354.2	0.272626
RFK	0.272862
MAPK1	0.273099
IL23A	0.273335
SPDYE3	0.273572
CENPA	0.273808
HLF	0.274045
C1orf226	0.274281
CLDN11	0.274518
P2RY10	0.274754
ZNF32	0.274991
AP2B1	0.275227
LMO4	0.275464
C8orf4	0.275701
CEBPZ-AS1	0.275937
ATOX1	0.276174
CEBPB	0.27641
RP11-723G8.2	0.276647
CD9	0.276884
AP000688.1	0.277357
RP11-944L7.5	0.27712
MOBP	0.277594
AC011308.1	0.277831
PHF6	0.278067
MORF4L2	0.278304
MTRNR2L7	0.278541
FAM195B	0.278778
MEF2BNB-MEF2B	0.279014
AC135178.1	0.279251
FGF18	0.279488
KCNJ6	0.279725
AC117834.1	0.279962
ARPP19	0.280435
TMEM11	0.280198
TCEAL3	0.280672
AC011239.1	0.280909
C20orf197	0.281146
SAT1	0.281383
RBM39	0.28162
FBXL16	0.281857
NDUFB4	0.282094
PCBP1	0.282331
AADAT	0.282568
ZSWIM7	0.282805
RAB1B	0.283042
ZNF75A	0.283279
USP46	0.283516
TNFAIP8L1	0.283753
JAZF1	0.28399
AC024257.1	0.284464
AC126614.1	0.284227
GNAZ	0.284701
CDKN2B	0.284938
PRPF38A	0.285175
IFRG15	0.285412
CPSF6	0.285649
PRMT8	0.285887
LINC00632	0.286124
BLID	0.286361
METTL14	0.286598
CTD-2203A3.1	0.286835
CNPY1	0.287073
MRPS14	0.28731
CTLA4	0.287547
ISY1-RAB43	0.287784
CXCR4	0.288022
RP11-195B21.3	0.288259
RAB41	0.288496
MAF1	0.288734
FAM96B	0.288971
HRK	0.289208
RBBP5	0.289446
LAS1L	0.289683
MYL3	0.28992
IZUMO1	0.290158
TPRG1L	0.290395
RP4-734P14.4	0.290632
GABRA3	0.29087
RNF185	0.291107
ATP5L2	0.291345
AC131971.1	0.291582
MLEC	0.29182
RP11-105C20.2	0.292057
HIST1H3F	0.292295
NXPH1	0.292532
CSNK2A1	0.29277
ALKBH5	0.293007
STARD3NL	0.293245
DCTN5	0.293483
COA1	0.29372
AC103801.2	0.293958
RAB3C	0.294195
ANAPC10	0.294433
POLE3	0.294671
TNFSF12-TNFSF13	0.294908
FOXD4L6	0.295146
ARPC2	0.295384
MRPS18C	0.295621
THAP11	0.295859
C18orf42	0.296097
UQCR11	0.296334
PF4V1	0.296572
IFITM2	0.29681
RRAGC	0.297048
TEF	0.297285
HSD17B11	0.297523
AC006538.4	0.297761
DDX3Y	0.297999
BCL7A	0.298237
TMEM65	0.298475
RABAC1	0.298712
RERG	0.29895
C9orf37	0.299188
PARP11	0.299426
OTX2	0.299664
KLRC2	0.299902
EIF2AK2	0.30014
SLC31A2	0.300378
WDR13	0.300616
C14orf1	0.301092
HIST1H2BH	0.300854
C11orf73	0.30133
H1F0	0.301568
AC124890.1	0.301806
AIDA	0.302044
IL8	0.302282
HIST1H4F	0.30252
EMP2	0.302758
AMN1	0.302996
HBZ	0.303234
NUDT10	0.303472
KAT5	0.30371
EIF3C	0.303949	Eif3c
PUF60	0.304187
MBNL3	0.304425
AC115618.1	0.304663
PPP2R5E	0.304901
DNPH1	0.30514
PKIB	0.305378
DYNLT1	0.305616
KHDRBS3	0.305854
EIF3L	0.306092
C12orf44	0.306331
TSPAN13	0.306569
AIG1	0.306807
TUBB3	0.307046
TMEM229B	0.307284
COMMD7	0.307522
OCLM	0.307761
PPP2R2A	0.307999
UBC	0.308237
RHOU	0.308476
PHF10	0.308953
SOX11	0.308714
PCED1B	0.309191
CNBP	0.30943
AGO1	0.309668
RPL12	0.309906
C1QA	0.310145
SCGB1D1	0.310383
FAM133B	0.310622
CERS1	0.31086
TMEM56	0.311099
ARL14EP	0.311338
CACUL1	0.311576
VPS26B	0.311815
CSTF1	0.312053
RP11-661C8.3	0.312292
CBWD5	0.312531
FOXR2	0.312769
EIF2S1	0.313008
FKBP11	0.313246
TRAPPC3	0.313485
ANAPC13	0.313724
CALM2	0.313963
SEPHS1	0.314201
SCAMP5	0.31444
LPPR5	0.314679
ID2	0.314917
S100P	0.315156
ACTR1A	0.315395
ZMYND11	0.315634
EIF4EBP2	0.315873
ATP6V0D1	0.316111
HIST1H2BC	0.31635
FAM9C	0.316589
MVB12B	0.316828
AP000322.53	0.317067
ATP6V1D	0.317783
SNF8	0.317545
TMEM167A	0.317306
CBLN3	0.318022
FAM195A	0.318261
AC004817.1	0.318739
C8orf88	0.3185
AC003006.7	0.318978
STAG2	0.319217
CTD-2140B24.4	0.319456
GCLM	0.319695
FTH1	0.319934
BCL2L15	0.320173
ATP5J2	0.320412
DYDC1	0.320651
HIST3H2BB	0.32089
SRR	0.321129
ARMCX1	0.321369
CYP17A1	0.321608
MT2A	0.321847
CS	0.322086
NRF1	0.322325
RNASE12	0.322564
HN1L	0.322803
RMND5A	0.323043
CGB	0.323282
NPIPA7	0.323521
SOX21	0.32376
SIGLECL1	0.324
DRAM1	0.324239
SMCP	0.324478
MAPK8	0.324717
ARPC5L	0.324957
ITGB3BP	0.325196
RHOJ	0.325435
CSTF3	0.325675
MAP2K6	0.325914
SMIM11	0.326153
APITD1-CORT	0.326393
ATP5E	0.326632
ASB7	0.326872
UTY	0.327111
COX5A	0.32735
ZNF483	0.32759
NR2C2AP	0.327829
TSR2	0.328069
EPGN	0.328308
MANBAL	0.328548
AC006946.15	0.328787
RAB30	0.329027
MTG1	0.329266
DEFB131	0.329506
RPL9	0.329745
KCNJ2	0.329985
SMS	0.330225
SFXN4	0.330464
CDK9	0.330704
CCDC58	0.330944
AC018867.1	0.331183
PPDPF	0.331423
CDC34	0.331662
ACTR3B	0.332142
MSN	0.331902
NXF3	0.332382
DEFA5	0.332621
CITED1	0.332861
C14orf64	0.333101
KLRC1	0.333341
LGI1	0.33358
ENC1	0.33382
DAZAP2	0.33406
CEBPA	0.3343
SUV39H2	0.33454
CALB1	0.334779
RBM22	0.335019
UCK2	0.335259
CD79B	0.335499
METTL1	0.335739
CUL4B	0.335979
SOX2	0.336219
RP11-1055B8.6	0.336459
HIST1H2AA	0.336699
ELAVL3	0.336939
HOXA6	0.337179
FAM104B	0.337419
FBXO46	0.337659
CYTH2	0.337899
KDELR2	0.338139
CCL15	0.338379
RP11-219B4.5	0.338619
C9orf62	0.338859
RAMP1	0.339099
TMEM9	0.339339
MB	0.339579
AL592284.1	0.339819
KRTAP25-1	0.340059
AC092291.2	0.34054
RP11-210M15.2	0.340299
CSNK1G3	0.34102
GCK	0.34078
ITGB1BP1	0.34126
OBP2B	0.3415
SEPT5	0.341741
PRAMEF20	0.341981
IL2RA	0.342221
ONECUT3	0.342461
FAM204A	0.342702
FAM3A	0.342942
CTXN1	0.343182
SSR3	0.343423
TOMM7	0.343663
NPLOC4	0.343903
RBM18	0.344144
LSMEM1	0.344384
SEC61B	0.344624
RAB22A	0.344865
SLC25A14	0.345105
C5orf48	0.345346
AP001350.1	0.345586
CYSTM1	0.345826
CENPV	0.346067
RRAGA	0.346307
SRSF7	0.346548
NDUFB3	0.346788
MMGT1	0.347029
LIN7B	0.347269
BRCC3	0.34751
UBQLN2	0.347751
PPARD	0.347991
EIF4A3	0.348232
GLRX2	0.348472
RP11-474G23.1	0.348713
EMC2	0.348954
GNG12	0.349194
LDB2	0.349435
MAGEB18	0.349676
KLRD1	0.349916
LEUTX	0.350157
ENSA	0.350398
STK38L	0.350638
TAF7	0.350879
RP11-872D17.8	0.35112
RHOG	0.351361
MRGBP	0.351601
KRTAP12-4	0.351842
KCNV1	0.352083
ERGIC2	0.352324
TNFAIP8	0.352565
NDUFAB1	0.352805
JKAMP	0.353046
LMO1	0.353287
KIAA1658	0.353528
SPINT4	0.353769
UQCRQ	0.35401
THRA	0.354251
TMEM97	0.354492
FNTB	0.354733
CTCF	0.354974
SLC25A4	0.355215
PRAMEF16	0.355456
RRAS2	0.355697
NAT8L	0.355938
PATE3	0.356179
COX6A1	0.35642
PCYT1B	0.356661
SPRR1A	0.356902
UFM1	0.357143
PLD6	0.357384
VCX	0.357625
S100A13	0.357866
IL1RAPL2	0.358107
C6orf106	0.358348
SMIM6	0.35859
MPZL1	0.358831
NKIRAS1	0.359072
C1orf233	0.359313
HPCAL1	0.359554
IL1B	0.359796
FAM192A	0.360037
RGS7BP	0.360278
SERTAD3	0.360519
GATM	0.360761
NPM1	0.361002
SMARCA5	0.361243
C14orf132	0.361485
HDAC8	0.361726
RPS12	0.361967
ARIH2	0.362209
RP13-672B3.2	0.36245
SLC25A16	0.362691
IFNA13	0.362933
RP11-536G4.1	0.363174
EIF3D	0.363416
MSI1	0.363657
RPS2	0.363899
C14orf142	0.36414
RP11-257K9.8	0.364381
PRPSAP2	0.364623
GNPNAT1	0.364864
PYURF	0.365106
AC007401.2	0.365348
CRABP1	0.365589
CABP1	0.365831
BMF	0.366072
KCNK12	0.366314
NAA50	0.366555
SSNA1	0.366797
WBP5	0.367039
DAPP1	0.36728
TXN2	0.367522
DCTN6	0.367764
MAGEB4	0.368005
RBM3	0.368247
AKIRIN2	0.368489
PSMD4	0.36873	Psmd4
SMR3B	0.368972
TMEM101	0.369214	Tmem101
SCIMP	0.369456
PIGH	0.369697
RPL7A	0.369939
FAM46D	0.370181
CSNK2A2	0.370423
THY1	0.370665
CDC26	0.370907
GAS1	0.371148
EID1	0.37139
ARPC3	0.371632
ATP5L	0.371874
TBC1D29	0.372116
SFN	0.372358
HNRNPA3	0.3726
FGF8	0.372842
C7orf76	0.373084
MRPS26	0.373326
CRIPT	0.373568
AC138393.1	0.374052
TRIM49D1	0.37381
CTNNB1	0.374294
EEF2	0.374536	Eef2
SIKE1	0.374778
NFYC	0.37502
IL5	0.375262
FLT3LG	0.375504
EIF4H	0.375746
BAD	0.375988
TBPL1	0.376231
MBTD1	0.376473
SYAP1	0.376715
DEFA3	0.376957
NDUFA12	0.377199
C8orf31	0.377442
SCRT1	0.377684
POLR3K	0.377926
RAB39A	0.378168
ZNF148	0.37841
PSMC6	0.378653
C1orf122	0.378895
CYHR1	0.37938
ZYG11B	0.379137
XG	0.379622
SFT2D2	0.379864
PRG2	0.380107
AC108868.1	0.380591
RAB31	0.380349
ARL1	0.380834
EGR3	0.381076
CT45A5	0.381319
KRTAP19-8	0.381561
CDK4	0.381804
RP11-410N8.4	0.382046
MSANTD4	0.382289
PRRT1	0.382531
SNRPG	0.382774
INSL3	0.383016
NDUFB1	0.383259
CYorf17	0.383744
UBE2Q2L	0.383501
STX1A	0.383986
SPR	0.384229
AL117190.2	0.384471
FZR1	0.384714
C17orf49	0.384957
MAB21L2	0.385199
AQP2	0.385442
RAB6A	0.385685
TSPAN14	0.385927
DHFR	0.38617
CABP7	0.386413
CNOT6L	0.386656
RNF38	0.386898
MOB1B	0.387141
AL137002.1	0.387627
AP001925.1	0.387384
IGFBP4	0.387869
GPR85	0.388112
UBTF	0.388355
EIF3I	0.388598
SLC25A11	0.388841
MXD4	0.389084
RFC5	0.389326
INSIG1	0.389569
UQCRFS1	0.389812
AL356356.1	0.390055
HIST1H2AG	0.390298
KRTCAP2	0.390541
SOST	0.390784
BTG4	0.391027
SF3B1	0.39127
OSTC	0.391513
DEFB112	0.391756
XPO1	0.391999
NPIPB7	0.392242
SYNCRIP	0.392485
MIF	0.392728
NPY5R	0.392971
SLC25A43	0.393214
FPR3	0.393457
INSIG2	0.3937
FTL	0.393944
C9orf170	0.394187
AQP3	0.39443
PRDX6	0.394673
POLD4	0.394916
CSTB	0.395159
CELF2	0.395403
PITPNC1	0.395646
ZNF791	0.395889
MRPL34	0.396132
BTG3	0.396376
TFCP2	0.396619
SRSF5	0.396862
DCAF4L1	0.397106
EEF1E1	0.397349
GRIK1-AS2	0.397592
EEF1A1	0.397836
HDAC11	0.398079
RPL35	0.398322
AL160175.1	0.398566
PHYHIPL	0.398809
SEPT2	0.399052
PRAMEF14	0.399296
S100A9	0.399539
SNAP23	0.399783
RORB	0.400026
IL17B	0.40027
CMTM3	0.400757
ERLIN2	0.400513
WDR5	0.401
AL162407.1	0.401244
ADK	0.401487
ARL3	0.401731
RPP25	0.401975
PRR18	0.402218
FBXW11	0.402462
ADIG	0.402705
PURB	0.402949
ATAD1	0.403193
TMEM57	0.403436
CDX4	0.40368
RSRC2	0.403924
LGALS1	0.404167
ANKRD49	0.404411
ASB9	0.404655
NBPF15	0.404899
TRA2A	0.405142
GGCT	0.405386
COX6A2	0.40563
RNF166	0.405874
SCN2B	0.406118
NAP1L6	0.406361
PYCR2	0.406605
PRMT5	0.406849
LPGAT1	0.407093
GCH1	0.407337
ACVR2A	0.407581
SMCO4	0.407825
TADA3	0.408069
CBX7	0.408312
TBCB	0.408556
ZDHHC22	0.4088
PHB	0.409044
TMEM9B	0.409288
MAGEB3	0.409532
GCG	0.409776
NDUFA2	0.41002
SMC3	0.410264
KCNK3	0.410509
CD47	0.410753
SSX3	0.410997
WDR26	0.411241
RASA4	0.411485
SLC9A6	0.411729
SAR1B	0.412217
SGMS1	0.411973
RBP4	0.412462
MYL9	0.412706
POU3F4	0.41295
PFDN2	0.413194
RPL18A	0.413438
FIGLA	0.413683
OTUD6A	0.413927
XRCC6	0.414171
NANOS2	0.414415
BAG2	0.41466
SLC25A28	0.414904
RP11-565P22.6	0.415148
CXXC5	0.415393
AGO3	0.415637
LIMD2	0.415881
AC007377.1	0.416615
AC061975.10	0.41637
AL591806.1	0.416126
ECHS1	0.416859
PEG10	0.417103
BTK	0.417348
AC092811.1	0.417837
CCND1	0.417592
IL13RA2	0.418081
TMEM50B	0.418326
C3orf27	0.41857
CAV1	0.418815
PRPF31	0.419059
ENOPH1	0.419304
RCHY1	0.419548
ATP6V1G2	0.419793
KRTAP15-1	0.420038
SULT4A1	0.420282
DEFB115	0.420527
MAP2K4	0.420772
THAP10	0.421016
SERTM1	0.421261
PDE6H	0.421506
MTRNR2L12	0.42175
GAPT	0.421995
HIST1H2BO	0.42224
HBG2	0.422484
CXorf67	0.422729
C6orf62	0.422974
PGF	0.423219
NOSIP	0.423463
CTC-273B12.7	0.423708
SPAG11B	0.423953
DCX	0.424198
SNRNP25	0.424443
ARHGEF9	0.424688
OGN	0.424932
TMEM45A	0.425177
DESI2	0.425422
AC091801.1	0.425667
FHL1	0.425912
GREM2	0.426157
NDUFA4L2	0.426402
GEMIN7	0.426647
ZNF275	0.426892
GNAO1	0.427137
GOLPH3	0.427382	Golph3
DNAJB4	0.427627
TMEM27	0.427872
HIST1H2BN	0.428117
EED	0.428362
TECR	0.428607
CBFB	0.428852
CNOT8	0.429097
PCBD1	0.429343
PDPK1	0.429588
KRBOX4	0.429833
PRDX2	0.430078
PPP2R2C	0.430323
RP11-111M22.2	0.430568
RP11-712L6.5	0.430814
FABP2	0.431059
CA11	0.431304
HIST1H2BA	0.431549
NTS	0.431795
CNR1	0.43204
CHMP3	0.432285
BRS3	0.43253
LIN28A	0.432776
DNAJA2	0.433021
GPX3	0.433266
GPR173	0.433512
NPRL2	0.433757
RBP2	0.434003
TIMP2	0.434248
ATP6C	0.434493
CST6	0.434739
S100A16	0.434984
SMARCD3	0.43523
BAX	0.435475
PRKX	0.435721
RNASE3	0.435966
GPR22	0.436212
NR2E1	0.436457
SCT	0.436703
ISCA2	0.436948
PAK2	0.437194
TRAPPC6B	0.437439
GNPDA1	0.437685
GPHA2	0.437931
DTX3	0.438176
MAGEB1	0.438422
FUT9	0.438667
KCTD13	0.438913
PRPF19	0.439159
CHRM1	0.439404
NXPH2	0.43965
RLN1	0.439896
SLC38A1	0.440142
FEZF2	0.440387
RMI2	0.440633
GPM6B	0.440879
SPATA31A1	0.441125
GRAP	0.441371
CUL5	0.441616
HECA	0.441862
ZNF605	0.442108
FABP4	0.442354
TMEM165	0.4426
KCTD9	0.442846
TIMM17B	0.443092
FAM210A	0.443337
STMN3	0.443583
FGF12	0.443829
ARL5A	0.444075
AC069547.1	0.444567
RP11-342M21.2	0.444321
INSL5	0.444813
C8orf22	0.445059
TNNT3	0.445305
LYN	0.445551
TMEM164	0.445797
CHORDC1	0.446043
ANKRD7	0.446289
ORMDL1	0.446536
GOLGA6L4	0.446782
CPSF4	0.447028
C2ORF15	0.447274
MAFB	0.44752
SMIM2	0.447766
MRPL14	0.448012
REG3A	0.448259
RPL32	0.448505
TIMP3	0.448751
TMEM218	0.448997
AC007216.2	0.449244
C1orf213	0.44949
ERGIC3	0.449736
GDF11	0.449982
PRSS8	0.450229
GTF2A1	0.450475
ZMYND19	0.450721
REEP1	0.450968
ANKRD9	0.451214
CD28	0.45146
SCN3B	0.451707
PELI1	0.451953
MS4A8	0.4522
RWDD2A	0.452446
IAPP	0.452692
RPL7	0.452939
NLGN4Y	0.453185
PLA2G12B	0.453432
GTF2F2	0.453678
FBXW2	0.453925
C3orf18	0.454171
PTP4A3	0.454418
AC135048.1	0.454664
NPIPB9	0.454911
SNAPIN	0.455158
AGTRAP	0.455404
GPR27	0.455651
AC016885.1	0.455897
DNAJC19	0.456144
C7orf61	0.456391
BARHL1	0.456637
C21orf37	0.456884
MT3	0.457131
ZNF75D	0.457378
KCNC1	0.457624
NDUFAF2	0.457871
AKTIP	0.458118
S100Z	0.458365
AKT1	0.458611
STT3A	0.458858
GMDS	0.459105
CDK19	0.459352
TAZ	0.459599
MYL12A	0.459845
RRAGB	0.460092
ASNA1	0.460339
ATL1	0.460586
HNRNPL	0.460833
CLDN12	0.46108
UBE2V1	0.461327	LOC679539
SHOX	0.461574
NAMPT	0.461821
PAXIP1-AS2	0.462068
TMEM212	0.462315
HMGN3	0.462562
GLRA2	0.462809
COX16	0.463056
RPS16	0.463303
EEF1G	0.46355
NUDT16L1	0.463797
SLAMF6	0.464044
NOG	0.464291
OSTF1	0.464538
MAD2L2	0.464785
ING2	0.465032
DDX46	0.46528
SCGB2A2	0.465527
ING5	0.465774
C1orf180	0.466021
ELAVL1	0.466268	Elavl1
AC105020.1	0.466516
MFAP5	0.466763
SNRPA	0.46701
PSENEN	0.467257
SPIN3	0.467505
RNASEK	0.467752
SMNDC1	0.467999
[truncated: 17,559 more rows]
